# Supplementary material
Source: MDPI journal article supplement (https://www.mdpi.com/2077-1444/14/4/543)
Supplement: s1 [file s1]

## Works by Paul Mendes-Flohr

### Books

1. *Von der Mystik zum Dialog: Martin Bubers geistige Entwicklung bis hin zu "Ich und Du"*. Mit einer Einführung von Ernst Simon, trans. Dafna A. von Kries (Königstein / Ts.: Jüdischer Verlag im Athenäum Verlag, 1978).  
- *From Mysticism to Dialogue: Martin Buber's Transformation of German Social Thought* (Detroit: Wayne State University Press, 1989).
2. *Moses Mendelsohn: An Intellectual Biography* (Tel Aviv: Open University, 1990) [booklet, Russian].
3. *Divided Passions: Jewish Intellectuals and the Experience of Modernity* (Detroit: Wayne State University Press, 1991).
4. (with Steven M. Löwenstein, Peter Pulzer, Monika Richarz), *Deutsch-jüdische Geschichte in der Neuzeit*, ed. Michael A. Meyer and Michael Brenner, vol. 3: *Umstrittene Integration, 1871-1918* (Munich: C.H. Beck, 1997).  
- (with Steven M. Löwenstein, Peter Pulzer, Monika Richarz), *German-Jewish History in Modern Times*, ed. Michael A. Meyer and Michael Brenner, vol. 3: *Integration in Dispute, 1871-1918* (New York: Columbia University Press, 1998).  
- Hebrew edition (Jerusalem: The Zalman Shazar Center / Historical Society of Israel, 2005).
5. (with Avraham Barkai, Steven M. Löwenstein), *Deutsch-jüdische Geschichte in der Neuzeit*, ed. Michael A. Meyer and Michael Brenner, vol. 4: *Aufbruch und Zerstörung, 1918-1945* (Munich: C.H. Beck, 1997).  
- (with Avraham Barkai, Steven M. Löwenstein), *German-Jewish History in Modern Times*, ed. Michael A. Meyer and Michael Brenner, vol. 4: *Renewal and Destruction, 1918-1945* (New York: Columbia University Press, 1998).  
- Hebrew edition (Jerusalem: The Zalman Shazar Center / Historical Society of Israel, 2005).
6. *German Jews: A Dual Identity* (London and New Haven: Yale University Press, 1999).  
- *Jüdische Identität: Die zwei Seelen der deutschen Juden*, trans. Dörthe Seifert (Munich and Paderborn: Fink, 2004).
7. *Jewish Philosophy: An Obituary* (Oxford: Oxford Center for Hebrew and Jewish Studies, 1999) [booklet].
8. *Love, Accusative and Dative: Reflections on Leviticus 19:18* (Syracuse, NY: Syracuse University Press, 2007) [booklet].
9. *Progress and its Discontents: The Struggle of Jewish Intellectuals with Modernity* (Tel Aviv: Am Oved, 2010) [Hebrew].
10. *Martin Buber: A Life of Faith and Dissent* (London: Yale University Press, 2019).  
- *Martin Buber: Ein Leben im Dialog*, trans. Eva-Maria Thimme (Berlin: Jüdischer Verlag/Suhrkamp Verlag, 2022).  
- Hebrew translation to appear in 2023.
11. *Cultural Disjunctions: Post-Traditional Jewish Identities* (Chicago / London: The University of Chicago Press, 2021).
12. Leather-bound special collector's edition of *Martin Buber. Faith and Dissent* (Yale University Press, 2022).

## Edited Volumes

1. (with Michael A. Fishbane), *Texts and Responses: Studies Presented to Nahum N. Glatzer on the Occasion of his Seventieth Birthday by his Students* (Leiden: Brill, 1975).
2. (with Dan V. Segre), *Jerusalem Executive Seminar Readings* (New York: Aspen Institute for Humanistic Studies, 1977).
3. (with Barry Kibbel), *Monotheism, Tradition, and Modernization* (New York: Aspen Institute for Humanistic Studies, 1978).
4. (with Lisa Mariassin Kaufman), *Executive Seminar Readings on Tradition and Modernization* (New York: Aspen Institute for Humanistic Studies, 1979).
5. Else Freund, *Franz Rosenzweig's Philosophy of Existence: An Analysis of "The Star of Redemption"*. trans, Stephen L. Weinstein and Robert Israel (The Hague: Martinus Nijhoff, 1979).
6. *Hokhmat Yisrael / Modern Jewish Studies: Historical and Philosophical Perspectives* (Jerusalem: The Zalman Shazar Center / Historical Society of Israel, 1979) [Hebrew].
7. (with Jehuda Reinharz), *The Jew in the Modern World: A Documentary History* (New York and Oxford: Oxford University Press, 1980).
  - Second, revised, expanded edition (New York / Oxford: Oxford University Press, 1995).
  - Russian edition, 2 vls. (Jerusalem and Moscow: Gesharim and Mosty kultury, 2003-2006).
  - Third, revised and greatly expanded edition (New York / Oxford: Oxford University Press, 2011).
8. Martin Buber, *Ein Land und zwei Völker: Zur jüdisch-arabischen Frage* (Frankfurt am Main: Insel Verlag, 1983).
  - Martin Buber, *A Land of Two Peoples: Martin Buber on Jews and Arabs* (New York / Oxford: Oxford University Press, 1983).
  - Martin Buber, *Une terre et deux peuples: La question judéo-arabe* (Paris: Lieu Commun, 1985) [Special preface written for this edition].
  - Martin Buber, *A Land of Two Peoples* (Tel Aviv: Schocken, 1988) [Hebrew].
  - Martin Buber, *Ein Land und zwei Völker: Zur jüdisch-arabischen Frage* (Frankfurt am Main: Jüdischer Verlag im Suhrkamp Verlag, 1993) [with revised, expanded introduction].
  - Martin Buber, *A Land of Two Peoples: Martin Buber on Jews and Arabs*. Rev. ed. With addendum to the introduction, "Buber's Legacy: 1993" (Gloucester, Mass.: Peter Smith, 1994).
  - Martin Buber, *A Land of Two Peoples* (Tokyo: Misuzu Shobo, 2005) [Japanese].
  - Martin Buber, *A Land of Two Peoples: Martin Buber on Jews and Arabs*, with a new preface (Chicago: University of Chicago Press, 2005).
  - Martin Buber, *Una terra e due popoli: Sulla questione ebraico-araba*, edizione italiana a cura di Irene Kajon e Paolo Piccolella (Florence: La Giuntina, 2007).
  - Martin Buber, *Una tierra para dos pueblos: Escritos políticos sobre la cuestión judeo-árabe* (Salamanca / Mexico City: Ediciones Sígueme / Universidad Nacional Autónoma de México, 2009).
  - Martin Buber, *A Land of Two Peoples* (Berlin: Aphorismua, 2018) [Arabic].
9. (with Yirmiyahu Yovel), *Between Theory and Practice: Essays in Honor of Nathan Rotenstreich on the Occasion of his Seventieth Birthday* (Jerusalem: Magnes Press, 1984) [Hebrew].

10. Martin Buber, *Ekstatische Konfessionen*, 5th ed. (Heidelberg: Lambert Schneider, 1984).  
 - *Ecstatic Confessions: The Heart of Mysticism*, collected by Martin Buber, trans. Esther Cameron (San Francisco: Harper & Row, 1985).  
 - Reprint (Syracuse, NY: Syracuse University Press, 1996).
11. (with Arthur A. Cohen), *Contemporary Jewish Religious Thought: Original Essays on Critical Concepts, Movements, and Beliefs* (New York: Charles Scribner's Sons, 1987).  
 - Paperback edition, with new preface by Paul Mendes-Flohr (New York: The Free Press, 1988).  
 - Hebrew edition (with Avraham Shapira) (Tel Aviv: am Oved, 1993).  
 - Reprint, with new title: 20<sup>th</sup> Century Jewish Religious Thought (Philadelphia: Jewish Publication Society of America, 2009).
12. (with Otto Dov Kulka), *Judaism and Christianity under the Impact of National Socialism, 1919-1945* (Jerusalem: The Zalman Shazar Centre / Historical Society of Israel, 1987).
13. *The Philosophy of Franz Rosenzweig* (Hanover, N.H. and London: Brandeis University Press by University Press of New England, 1988).  
 - Paperback reprint (Hanover, N.H. / London: Brandeis University Press by University Press of New England, 2009).
14. *Martin Buber on Peace and the Fraternity of Peoples* (Sefaryam: Al 'Masrak, 1990) [Hebrew and Arabic, face-en-face].
15. Uriel Tal, *Political Theology and the Third Reich* (Tel Aviv: Sifriat Poalim, 1991) [Hebrew].
16. (with Nahum N. Glatzer), *The Letters of Martin Buber: A Life of Dialogue*, trans. Richard and Clara Winston, Harry Zohn (New York: Schocken, 1991).  
 - Reprint (Syracuse: Syracuse University Press, 1996).
17. (with Kalman Yaron), *Martin Buber in Perspective* (Jerusalem: Magnes Press, 1992) [Hebrew].
18. *Gershom Scholem: The Man and His Work* (Jerusalem / Albany, NY: The Israel Academy of Sciences / Humanities and State University of New York Press, 1994).
19. *History, Memory, and Action: International Conference in Memory of Nathan Rotenstreich, Jerusalem 1994* (Jerusalem: The Israel Academy of Sciences and Humanities, 1996) [Hebrew].
20. Nathan Rotenstreich, *On Faith* (Chicago: University of Chicago Press, 1998).
21. (with David Stern), *An Arthur A. Cohen Reader: Selected Fiction and Writings on Judaism, Theology, Literature, and Culture* (Detroit: Wayne State University Press, 1998).
22. (Editor-in-Chief, with Peter Schäfer), *Martin Buber Werkausgabe* (Gütersloh: Gütersloher Verlagshaus, 2001ff.) [22 volumes projected].
23. *Martin Buber: A Contemporary Perspective* (Proceedings of an international conference held at the Israel Academy of Sciences and Humanities and Syracuse University Press, 2002).
24. (with Yom-Tov Assis and Leonardo Senkman), *Identidades judías, modernidad y globalización* (Buenos Aires: Ediciones Lilmod, 2007).
25. (with Hans-Josef Klauck et. al.), *Encyclopedia of the Bible and its Reception* (Berlin / New York: de Gruyter, 2009ff.) [30 volumes projected].

26. (with Anya Mai in collaboration with Hanna Delf von Wolzogen), *Gustav Landauer: Anarchist and Jew* (Oldenbourg: de Gruyter, 2014).
27. *Dialogue as a Trans-Disciplinary Concept: Martin Buber's Philosophy of Dialogue and its Contemporary Reception – Studia Judaica 83* (Berlin / Munich / Boston: de Gruyter, 2015).
28. (with Avihu Zakai), *Fields in the Wind: A Tribute to Avraham Shapira in Friendship and Appreciation* (Jerusalem: Carmel Publishers, 2015) [Hebrew].
29. (with Susanne Talabardon and Bernd Witte), *Martin Buber Werkausgabe 17 – Chassidismus II – Theoretische Schriften* (Gütersloh: Gütersloher Verlagshaus, 2016).
30. (with Rachel Freudenthal), *Wissenschaft des Judentums: History and New Horizons* (Berlin: de Gruyter Verlag, 2017).
31. (with Rachel Livneh-Freudenthal, Guy Miron), *Jewish Historiography Between Past and Future. 200 Years of Wissenschaft des Judentums – Studia Judaica 102* (Berlin / Boston: de Gruyter, 2019).
32. (with Michael Fishbane), *Martin Buber: Werkausgabe 20 – Schriften zum Judentum* (Gütersloh: Gütersloher Verlagshaus, 2018).
33. (with Bernd Witte), *Martin Buber Werkausgabe 11 – Schriften zur politischen Philosophie und zur Sozialphilosophie* (Gütersloh: Gütersloher Verlagshaus, 2019) eBook.
34. (with Andreas Losch; Bernd Witte), *Martin Buber Werkausgabe 4 – Schriften über das dialogische Prinzip* (Gütersloh: Gütersloher Verlagshaus, 2019).
35. (with Heike Breitenbach, Michael A. Fishbane, Andreas Losch, Christian Wiese and Bernd Witte), *Martin Buber Werkausgabe 13 – Schriften zur biblischen Religion* (Gütersloh: Gütersloher Verlagshaus, 2019).
36. (with Andreas Losch and Bernd Witte), *Martin Buber Werkausgabe 4 – Schriften über das dialogische Prinzip* (Gütersloh: Gütersloher Verlagshaus, 2019).
37. (with Samuel Hayim Brody), *Martin Buber Werkausgabe 21 – Schriften zur zionistischen Politik und zur jüdisch-arabischen Frage* (Gütersloh: Gütersloher Verlagshaus, 2020).
38. (with Kelly James Clark) *Richard F. Kaufman, 'A Spiritual Right of Passage. Conversion and Human Dignity in the Jewish Tradition* (Grand Rapids: The Kaufman Interfaith Institute–Grand Valley University, 2020).
39. *Chicago Companion to Martin Buber* (Chicago: University of Chicago Press, 2023).

#### Articles and Book Chapters

1. (with Carol Bosworth), "The Dialectics of the Israeli-Arab Dispute: Apocalyptic Politics" (New York: American Jewish Committee, 1969) [pamphlet].
2. "The Road to 'I and Thou': An Inquiry into Buber's Transition from Mysticism to Dialogue," in Michael A. Fishbane and Paul Mendes-Flohr, eds., *Texts and Responses: Studies Presented to Nahum N. Glatzer on the Occasion of his Seventieth Birthday by his Students* (Leiden: Brill, 1975), 201-225.
3. "Werner Sombart's 'The Jews and Modern Capitalism': An Analysis of Its Ideological Premises," *Leo Baeck Institute Year Book* 21 (1976), 87-107.
4. (with Bernard Susser), "'Alte und neue Gemeinschaft' – An Unpublished Buber Manuscript," *Association for Jewish Studies Review* 1 (1976), 41-56.
5. "Martin Buber's Concept of the Centre and Social Renewal," *The Jewish Journal of Sociology* 18:1 (1976), 17-26.

6. "A Response to Richard Marienstras, 'The Jews of the Diaspora, or the Vocation of a Minority'," *European Judaism* 1 (1976), 1-3.
7. (with Jehuda Reinharz), "From Relativism to Religious Faith: The Testimony of Franz Rosenzweig's Unpublished Diaries," *Leo Baeck Institute Year Book* 22 (1977), 161-174).
8. "Martin Buber and the Moral Dilemma of Zionism: A Believing Realism," *The Jerusalem Quarterly* 3 (Spring 1977), 74-84.
9. "Spinoza: Renegade or Meta-Rabbi?," *Forum on the Jewish People, Zionism and Israel* 27:2 (1977), 54-63.
10. (with Stephen L. Weinstein), "The Heretic as Hero: Spinoza and the Jews of Modernity," *The Jerusalem Quarterly* 7 (Winter 1978), 57-63.
11. "The Throes of Assimilation: Self-Hatred and the Jewish Revolutionary," *European Judaism* 12:1 (1978), 34-39.
12. "Martin Buber und das nachtraditionelle Judentum: Überlegungen aus Anlaß seines 100. Geburtstages," *Tribüne* 17/66 (September 1978), 118-120.
13. "Martin Buber and Post-Traditional Judaism," *European Judaism* 12:2 (1978), 4-7.
14. "Ernst Simon zum 80. Geburtstag," *Freiburger Rundbrief* 30:113-116 (1978), 60-61.
15. Book Review: "Günter Stemberger, 'Geschichte der jüdischen Literatur: Eine Einführung'," *Arcadia* 14:3 (1979), 308-311.
16. "Between Existentialism and Zionism: A Non-Philippic Credo," *Journal of the American Academy of Religion* 47:3 (1979), 429-440.
17. "El autoodio judío," *Dispersion y Unidad* 1 (1979), 81-91.
18. "Moses Mendelssohn's Philosophy and Its Place in History," in Nahum T. Gidal, ed., *Moses Mendelssohn and His Time: An Exhibition in Honour of the 250<sup>th</sup> Anniversary of His Birth* (Tel Aviv: Museum of the Diaspora, 1979) [no pagination, 4 pp., Hebrew and English versions].
19. "Introduction" to Paul Mendes-Flohr, ed., *Hokhmat Yisrael / Modern Jewish Studies: Historical and Philosophical Perspectives* (Jerusalem: The Zalman Shazar Center / Historical Society of Israel, 1979), 9-31 [Hebrew].
20. "Tradition and the Crisis of Modernity." *Occasional Paper of the Aspen Institute for Humanistic Studies* (New York: Aspen Institute for Humanistic Studies, 1980).
21. "Martin Buber between Nationalism and Mysticism," *Iyyun: A Hebrew Philosophical Quarterly* 29:1-2 (1980), 71-92 [Hebrew].
22. "Rosenzweig and Kant: Two Views of Ritual and Religion," in Jehuda Reinharz and Daniel Swetschinski, eds., *Mystics, Philosophers, and Politicians: Essays in Jewish Intellectual History in Honor of Alexander Altmann* (Durham: Duke University Press, 1982), 315-341.
23. "The Study of the Jewish Intellectual: Some Methodological Proposals," in Frances Malino and Phyllis Cohen-Albert, eds., *Essays in Modern Jewish History: A Tribute to Ben Halpern* (London: Associated University Presses, 1982), 142-172.
24. "Gemeinschaft and its Renewal: Dialogue as a Meta-Sociological Principle," in Shmaryahu Talmon, Kalmon Yaron and Yosef Immanuel, eds., *Here and Now: On the Social and Religious Thought of Martin Buber* (Jerusalem: The Martin Buber Centre / Hebrew University, 1982), 51-62 [Hebrew].
25. "Glaube und Politik im Werk Martin Bubers," in Werner Licharz, ed., *Dialog mit Martin Buber* (Frankfurt am Main: Haag / Herchen, 1982), 90-107.
26. "La place de Franz Rosenzweig parmi les penseurs juifs allemands," *Les Nouveaux Cahiers* 72 (1983), 23-27.

27. "Sentiment, Memory and Vision: Between Existentialism and Zionism," *Forum on the Jewish People, Zionism and Israel* 48 (Spring 1983), 53-62.
28. "'To Brush History against the Grain': The Eschatology of the Frankfurt School and Ernst Bloch," *Journal of the American Academy of Religion* 51:4 (1983), 631-650.
29. "Secular Religiosity: Reflections on Post-Traditional Jewish Spirituality and Community," in Marc Lee Raphael, ed., *Approaches to Modern Judaism*, vol. 1 (Chico, CA: Scholars Press, 1983), 19-30 [abridged version in *Bulletin of the Center for the Study of World Religions*, Harvard University (Spring 1982), 5-16].
30. "'Fin-de-siècle' Orientalism, the 'Ostjuden,' and the Aesthetics of Jewish Self-Affirmation," *Studies in Contemporary Jewry* 1 (1984), 96-139.  
 - expanded Hebrew version: "Orientalism and Mysticism: The Aesthetics of Jewish Identity at the Fin de Siècle," *Jerusalem Studies in Jewish Thought* 3 (1984), 50-98.  
 - French version: "L'orientalisme fin-de-siècle: Les 'Ostjuden' et l'esthétique de l'affirmation juive de soi," *Pardès* 5 (1987), 49-74.  
 - Italian version: "L'orientalismo fine secolo, gli 'Ostjuden' e l'estetica dell'affermazione ebraica di sé," in *Pardès: Ebraicità e Germanità* (Milano: Thalassa de Paz, 1999), 75-110.
31. "The Jewish Intellectual: A Clarification of the Term," in Paul Mendes-Flohr and Yirmiyahu Yovel, eds., *Between Theory and Practice: Essays in Honor of Nathan Rotenstreich on the Occasion of his Seventieth Birthday* (Jerusalem: Magnes Press, 1984), 310-317 [Hebrew].
32. "The Intellectual and Zionism: An Appreciation of Ben Halpern," *Jewish Frontier* 51:9-10 (1984), 43-47.
33. "Arthur Cohen," *Encyclopedia Judaica Yearbook 1983-85* (Jerusalem: Keter, 1985), 237-238.
34. "The Tent Within," in John Menken, ed., *The Tent of Meeting: Texts* (Santa Fe: Tent of Meeting, 1985), 1-14.
35. "After Auschwitz – After Hiroshima," in Fumikatsu Inoue, ed., *Gateway to Peace: Auschwitz Memorial Pavilion, Kurose, Hiroshima* (n. p., 1985), 25-26 [English and Japanese].
36. "'Realpolitik' or Ethical Nationalism?," *Jerusalem Quarterly* 34 (1985), 88-98.
37. "Prophetic Politics and Meta-Sociology: Martin Buber and German Social Thought," *Archives de Sciences Sociales des Religions* 60:1 (1985), 67-82.
38. "Martin Buber's Hebrew Humanism Reconsidered," *New Outlook: Middle East Monthly* 29 (Spring 1986), 23-31.
39. "Power or Spirit: Jewish Political Thought in Interbellum Europe," in Joseph Alpher, ed., *Nationalism and Modernity: A Mediterranean Perspective* (New York: Praeger, 1986), 66-78.
40. "Martin Buber's Reception among Jews," *Modern Judaism* 6/2 (1986), 111-126.
41. "Las ambigüedades morales del sionismo: Realpolitik o nacionalismo ético?," *Dispersion y Unidad* 3 (1986), 12-26.
42. "Martin Buber's Conception of God," in Albino Babolin, ed., *Teologia Filosofica e Filosofia della Religione* (Perugia: Benucci, 1986), 149-219.
43. "The Jew as Cosmopolitan," *Proza: Hebrew Literary and Art Magazine* 87 (August 1986), 30-35 [Hebrew].
44. "Nationalismus der Innerlichkeit: Philosophical Aspects of Buber's Conception of Culture and Hebrew Humanism," in *Essays on the Occasion of the Twentieth*

- Anniversary of the Death of Martin Buber* (Jerusalem: The Israel Academy of the Sciences and Humanities, 1986/1987), 34-50 [Hebrew].
45. "Culture," in Arthur A. Cohen and Paul Mendes-Flohr, eds., *Contemporary Jewish Religious Thought: Original Essays on Critical Concepts, Movements, and Beliefs* (New York: Charles Scribner's Sons, 1987), 119-130.
  46. "History," in Arthur A. Cohen and Paul Mendes-Flohr, eds., *Contemporary Jewish Religious Thought: Original Essays on Critical Concepts, Movements, and Beliefs* (New York: Charles Scribner's Sons, 1987), 321-387.
  47. "The Appeal of the Incurable Idealist: Judah L. Magnes and the Mandarins of Jerusalem," in William M. Brinner and Moses Rischin, eds., *Like All the Nations? The Life and Legacy of Judah L. Magnes* (Albany, NY: State University of New York Press, 1987), 139-153.
  48. "Ambivalent Dialogue: Jewish-Christian Theological Encounter in the Weimar Republic," in Otto Dov Kulka and Paul Mendes-Flohr, eds., *Judaism and Christianity under the Impact of National Socialism, 1919-1945* (Jerusalem: The Zalman Shazar Center / Historical Society of Israel, 1987), 99-132.
  49. "Law and Sacrament: Ritual Observance in the Twentieth-Century Jewish Thought," in Arthur Green, ed., *Jewish Spirituality*, vol. 2: *From the Sixteenth Century Revival to the Present* (New York: Crossroad, 1987), 317-345.
  50. Book Review: "George Mosse, 'German Jews beyond Judaism'," *Studies in Contemporary Jewry* 3 (1987), 376-379.
  51. "Mendelssohn and Rosenzweig," *Journal of Jewish Studies* 38/2 (1987), 203-211.
  52. "Martin Buber and the Metaphysicians of Contempt," in Jehuda Reinharz, ed., *Living with Antisemitism: Modern Jewish Responses* (Hanover, N.H. / London: Brandeis University Press by University Press of New England, 1987), 133-164.
  53. "Jewish Thought and Philosophy: Modern Thought," in Mircea Eliade, ed., *Encyclopedia of Religion*, 2<sup>nd</sup> rev. ed., vol. 7 (Detroit: Thomson Gale / Macmillan Reference, 2005), 4899-4910.
  54. "Jewish Continuity in an Age of Discontinuity: Reflections from the Perspective of Intellectual History," *Journal of Jewish Studies* 39:2 (1988), 261-268.
  55. (with Ze'ev Gries) "Introduction" to Martin Buber, *The Tales of Rabbi Nachman*, rev., expanded edition (Atlantic Highlands, N.J.: Humanities Press International, 1988), 9-28.
  56. "Ökumene: A New Rosenzweig Manuscript," in Moshe Idel, Warren Ze'ev Harvey, and Eliezer Schweid, eds., *Shlomo Pines Jubilee Volume on the Occasion of His Eightieth Birthday* (Jerusalem: Magnes Press, 1988), 95-108 [Hebrew].
  57. "Franz Rosenzweig and the German Philosophical Tradition," Introductory essay to Paul Mendes-Flohr, ed., *The Philosophy of Franz Rosenzweig* (Hanover, N.H. / London: Brandeis University Press by University Press of New England, 1988), 1-19.
  58. "Franz Rosenzweig and the Crisis of Historicism," in Paul Mendes-Flohr, ed., *The Philosophy of Franz Rosenzweig* (Hanover, N.H. and London: Brandeis University Press by University Press of New England, 1988), 138-161.
  59. "Om Sionismen är ed Dröm, är Verkligheten," *Judisk Krönika* 2-3 (Juni 1988), 14-18.
  60. "Mendelssohn and Rosenzweig," in Wolfdietrich Schmied-Kowarzik, ed., *Der Philosoph Franz Rosenzweig (1886-1929). Internationaler Kongress, Kassel 1986*, vol. 1: *Die Herausforderung jüdischen Lernens* (Freiburg and Munich: Karl Alber, 1988), 213-223.

61. "The Intifada and the Jews," *Shomer ha-Nitzotz* (May 19, 1988), 3-4 [Hebrew].
62. "Franz Rosenzweig's Concept of Philosophical Faith," in Albino Babolin, ed., *Fede Filosofica e Filosofia della Religione* (Perugia: Benucci, 1988), 65-83 and 85-95.
63. "The Politics of Covenantal Responsibility: Martin Buber and Hebrew Humanism," *Orim* 3:2 (1988), 7-21.  
 "The Politics of Covenantal Responsibility: Martin Buber and Hebrew Humanism," in Joshua Stampfer, ed., *Dialogue: The Essence of Buber*, vol. 1 (Portland: Lewis and Clark College, 1988), 15-34).
64. "The Tragedy of Zionism: A Review Essay," *Moment Magazine* 11/6 (1988), 58-60.
65. Book Review: "Pamela Vermes, 'Buber'," *Journal of Jewish Studies* 39/2 (1988), 287-289.
66. Book Review: "John M. Oesterreicher, 'The Unfinished Dialogue: Martin Buber and the Christian Way' and 'The New Encounter between Christians and Jews'," *Journal of Religion* 69:1 (1989), 115-117.
67. "Nationalism as a Spiritual Sensibility: The Philosophical Suppositions of Buber's Hebrew Humanism," *Journal of Religion* 69:2 (1989), 155-168.
68. "Begegnungen und Vergegnungen: Die Rezeption Bubers im Judentum," in Werner Licharz and Heinz Schmidt, eds., *Martin Buber (1878-1965): Internationales Symposium zum 20. Todestag*, vol. 1: *Dialogik und Dialektik* (Frankfurt am Main: Haag und Herchen, 1989), 239-263.
69. "Das Volk des Bundes und seine politisch-moralische Verantwortung: Bubers Zionismus und der Staat Israel," in Werner Licharz and Heinz Schmidt, eds., *Martin Buber (1878-1965): Internationales Symposium zum 20. Todestag*, vol. 2: *Vom Erkennen zum Tun des Gerechten* (Frankfurt am Main: Haag und Herchen, 1989), 203-221.
70. "Twentieth-Century Jewish Thought," in Glenda Abramson, ed., *The Blackwell Companion to Jewish Culture: From the Eighteenth Century to the Present* (Oxford / Cambridge: Blackwell, 1989), 623-643.
71. Book Review: "Emil L. Fackenheim, 'What is Judaism? An Interpretation for the Present Age'," *Journal of Religion* 70:1 (1990), 127-128.
72. "Rosenzweig and the 'Kameraden': A Non-Zionist Alliance," *Journal of Contemporary History* 26/3-4 (1991), 385-402 [special issue: *The Impact of Western Nationalisms; Essays Dedicated to Walter Z. Laqueur on the Occasion of his 70<sup>th</sup> Birthday*].  
 - Revised version: "Rosenzweig and the 'Kameraden': A Non-Zionist Alliance," in Jehuda Reinharz and George L. Mosse, eds., *The Impact of Western Nationalisms: Essays Dedicated to Walter Z. Laqueur on the Occasion of his 70<sup>th</sup> Birthday* (London: Sage Publications, 1992), 31-48.
73. "The Yoke of the Kingdom in Jerusalem," in Moses Rischin and Raphael Asher, eds., *The Jewish Legacy and the German Conscience: Essays in Memory of Rabbi Joseph Asher* (Berkeley: Judah L. Magnes Museum, 1991), 233-245.
74. "Zion und die Diaspora. Vom babylonischen Exil bis zur Gründung des Staates Israel," in Andreas Nachama, Julius H. Schoeps and Edward van Voolen, eds., *Jüdische Lebenswelten: Essays* (Frankfurt am Main: Jüdischer Verlag im Suhrkamp Verlag, 1991), 257-284.
75. "'Knowledge as Service': An Appreciation of Nahum N. Glatzer," *Jewish Studies* 31 (1991), 25-49.



76. "'The Stronger and the Better Jews': Jewish Theological Responses to Political Messianism in the Weimar Republic," *Studies in Contemporary Jewry* 7 (1991), 159-185.
77. "Buber's Narratology for Arab-Israeli Understanding," in Kalman Yaron and Paul Mendes-Flohr, eds., *Martin Buber in Perspective* (Jerusalem: Magnes Press, 1992), 27-36 [Hebrew].  
- "Buber's Narratology for Arab-Israeli Understanding," in Kalman Yaron and Franz Pöggeler, eds., *Meeting of Cultures and Clash of Cultures: Adult Education in Multicultural Societies* (Jerusalem: Magnes Press, 1993), 61-68.
78. "Theologian before the Abyss", Introductory essay to Alexander Altmann, *The Meaning of Jewish Existence: Theological Essays, 1930-1939*, ed. Alfred L. Ivry (Hanover, N.H. / London: Brandeis University Press by University Press of New England, 1992), xiii-xlvii.
79. "The Retrieval of Innocence and Tradition: Jewish Spiritual Renewal in an Age of Liberal Individualism," in Jack Wertheimer, ed., *The Uses of Tradition: Jewish Continuity in the Modern Era* (New York: Jewish Theological Seminary, 1992), 279-301.
80. "L'intellectuel juif modern," in Shmuel Trigano, ed., *La Société juive à travers l'histoire*, vol. 1 (Paris: Fayard, 1992), 239-262.
81. "The Dialectic of Atheism and Secularization in Modern Jewish Thought," in Albino Babolin, ed., *ateismo e Società* (Perugia: Benucci, 1992), 233-248.
82. "Hebrew as a Holy Tongue: Franz Rosenzweig and the Renewal of Hebrew," in Lewis Glinert, ed., *Hebrew in Ashkenaz: A Language in Exile* (New York and Oxford: Oxford University Press, 1993), 222-241.
83. "A Passion for Theology: Reflections on the Legacy of Arthur A. Cogen," in Irene Kajon, ed., *La storia della filosofia ebraica* (Padova: Cedam, 1993), 487-496.
84. "Scholarship as a Craft: Reflections on the Legacy of Nahum Glatzer," *Modern Judaism* 13:3 (1993), 269-276.
85. "Il concetto del miracolo in Franz Rosenzweig," in Mario Micheletti and Armando Savignano, eds., *Filosofia della religione: Indagini storiche e riflessioni critiche* (Genova: Marietti, 1993), 59-80.
86. "Ahad Ha-am," in Geoffrey Wigoder, ed., *New Encyclopedia of Zionism and Israel* (London and Toronto: Herzl Press by Associated University Presses, 1994), vol. 1, 42-43.
87. "Shmuel Hugo Bergman," in Geoffrey Wigoder, ed., *New Encyclopedia of Zionism and Israel* (London / Toronto: Herzl Press by Associated University Presses, 1994), vol. 1, 189.
88. "Martin Buber," in Geoffrey Wigoder, ed., *New Encyclopedia of Zionism and Israel* (London / Toronto: Herzl Press by Associated University Presses, 1994), vol. 1, 230-231.
89. "Aharon David Gordon," in Geoffrey Wigoder, ed., *New Encyclopedia of Zionism and Israel* (London / Toronto: Herzl Press by Associated University Presses, 1994), vol. 1, 493-494.
90. "The Haskalah," in Geoffrey Wigoder, ed., *New Encyclopedia of Zionism and Israel* (London / Toronto: Herzl Press by Associated University Presses, 1994), vol. 1, 565-566.
91. "Jacob Klatzkin," in Geoffrey Wigoder, ed., *New Encyclopedia of Zionism and Israel* (London / Toronto: Herzl Press by Associated University Presses, 1994), vol. 2, 813-814.

92. "Nathan Rotenstreich," in Geoffrey Wigoder, ed., *New Encyclopedia of Zionism and Israel* (London / Toronto: Herzl Press by Associated University Presses, 1994), vol. 2, 1123-1124.
93. "Eliezer Schweid," in Geoffrey Wigoder, ed., *New Encyclopedia of Zionism and Israel* (London / Toronto: Herzl Press by Associated University Presses, 1994), vol. 2, 1174.
94. "The Theological-Political Predicament of Modern Judaism: Leo Strauss's Neo-Maimonidean Political Ethic," in Albino Babolin, ed., *Politica e Filosofia della Religione* (Perugia: Benucci, 1994), 285-316.  
- "Il Dilemma Teologico-Politico del Guidaismo Moderno: L'Etica Politica Neo Mainonidea di Leo Strauss," *Segni e Comprensione* 8:21 (1994), 33-55.
95. "The Spiritual Quest of the Philologist," Introductory essay to Paul Mendes-Flohr, ed., *Gershom Scholem: The Man and His Work* (Jerusalem / Albany, NY: The Israel Academy of Sciences and Humanities / State University of New York Press, 1994), 1-28.
96. "In Pursuit of Normalcy: Zionism's Ambivalence toward Israel's Election," in William Hutchinson and Hartmut Lehmann, eds., *Many Are Chosen: Divine Election and Western Nationalism* (Minneapolis: Fortress Press, 1994), 203-229.
97. "Dialogue as a Political and Religious Task: Martin Buber's Vision of Israeli-Palestinian Reconciliation," *Palestine-Israel Journal* 1:2 (Spring 1994), 67-73.
98. (with Friedrich Niewöhner), "Nathan Rotenstreich zum Gedenken (1914-1993)," Afterword to a posthumous essay by Nathan Rotenstreich, "Recht, Gesetz und Individuum: Zu Hermann Cohens Praktischer Philosophie," ed. Paul Mendes-Flohr and Friedrich Niewöhner, *Zeitschrift für Religions- und Geistesgeschichte* 46:2 (1994), 107-108.
99. "Foreword" to Barbara E. Galli, *Franz Rosenzweig and Jehuda Halevi: Translating, Translations, and Translators* (Montreal: McGill-Queen's University Press, 1995), xv-xvi.
100. "Martin Bubers Rezeption im Judentum – prophetisch, widersprüchlich, vielfältig," in Helga Krüger-Day, ed., *Aus dem Chaos Kosmos formen: Martin Bubers Wegweisung zum Leben* (Berlin: Evangelische Akademie Berlin-Brandenburg, 1995), 4-21.
101. "Sprachformen der Verständigung: Martin Buber und der israelisch-palästinensische Dialog," in Jakob Hessing, ed., *Jüdischer Almanach 1996* (Frankfurt am Main: Jüdischer Verlag im Suhrkamp Verlag, 1995), 83-91.
102. "The Emancipation of European Jewry: Why was it not Self-Evident?," *Studia Rosenthaliana* 30:1 (1996), 7-20.
103. "Judaism and the Polis," *Journal of Ecumenical Studies*, 33/3 (1996), 388-393.
104. "On Nathan Rotenstreich: The Thinker between Honoring the Philosophical Tradition and Its Creation," in Eva Shorr, ed., *History, Memory, and Action: International Conference in Memory of Nathan Rotenstreich, Jerusalem 1994* (Jerusalem: The Israel Academy of Sciences and Humanities, 1996), 5-10 [Hebrew].
105. "Introduction: Nathan Rotenstreich – An Intellectual Portrait," in Nathan Rotenstreich, *Essays in Jewish Philosophy in the Modern Era*, ed. Reinier Munk (Amsterdam: J.C. Gieben [Brill], 1996), xi-xiii.
106. "Nachwort," in Martin Buber, *Hundert chassidische Geschichten* (Zurich: Manesse, 1996), 80-90.

107. "Sion en de diaspora," in Gerard Cornelis den Hertog and H.M. van der Vegt, eds., *Woestijn en openbaring: Bijbelse wortels, joodse en christelijke interpretaties* (Kampen: Kok, 1996), 139-156.
108. "Zarathustra's Apostle: Martin Buber and the Jewish Renaissance," in Jacob Golomb, ed., *Nietzsche und die jüdische Kultur* (Vienna: Universitätsverlag, 1998), 225-235.
109. "Franz Rosenzweig (1886-1929)," in Hans Erler, Ernst Ludwig Ehrlich, and Ludger Heid, eds., *"Meinetwegen ist die Welt erschaffen": Das intellektuelle Vermächtnis des deutschsprachigen Judentums. 58 Portraits* (Frankfurt am Main / New York: Campus, 1997), 59-65.
110. "1914 – Franz Rosenzweig Writes the Essay 'Atheistic Theology,' which Critiques the Theology of his Day," in Sander L. Gilman and Jack Zipes, eds., *Yale Companion to Jewish Writing and Thought in German Culture, 1096-1996* (New Haven / London: Yale University Press, 1997), 322-326.
111. "Wissenschaft des Judentums at the Fin-de-siècle," in Michael Graetz and Aram Mattioli, eds., *Krisenwahrnehmungen im Fin d siècle: Jüdische und katholische Bildungseliten in Deutschland und der Schweiz* (Zurich: Chronos Verlag, 1997), 67-81.
112. "Apocalyptic and Prophetic Eschatology: A Jewish Homage to St. John of Patmos," in Sarah Hobson and Jane Lubchenco, eds., *Revelation and the Environment, AD 95-1995: Patmos Symposium 1, 20-27 September 1995* (Singapore / River Edge, N.J.: World Scientific, 1997), 157-160.
113. Book Review: "Michael A. Fishbane, 'The Kiss of God: Spiritual and Mystical Death in Judaism'," *History of Religions* 37:2 (1997), 172-174.
114. "The 'Freies Jüdisches Lehrhaus' of Frankfurt," in Karl E. Grözinger, ed. *Jüdische Kultur in Frankfurt am Main von den Anfängen bis zur Gegenwart* (Wiesbaden: Harrassowitz, 1997), 217-229.
115. "Images of Knowledge in Modern Jewish Thought," *Trumah* 6 (1997), 93-106.
116. "S.H. Bergman," in R.J. Zwi Werblowsky and Geoffrey Wigoder, eds., *The Oxford Dictionary of the Jewish Religion* (New York / Oxford: Oxford University Press, 1997), 116.
117. "Martin Buber," in R.J. Zwi Werblowsky and Geoffrey Wigoder, eds., *The Oxford Dictionary of the Jewish Religion* (New York / Oxford: Oxford University Press, 1997), 141-142.
118. "Hermann Cohen," in R.J. Zwi Werblowsky and Geoffrey Wigoder, eds., *The Oxford Dictionary of the Jewish Religion* (New York / Oxford: Oxford University Press, 1997), 165-166.
119. "Solomon Formstecher," in R.J. Zwi Werblowsky and Geoffrey Wigoder, eds., *The Oxford Dictionary of the Jewish Religion* (New York / Oxford: Oxford University Press, 1997), 258.
120. "Samuel Holdheim," in R.J. Zwi Werblowsky and Geoffrey Wigoder, eds., *The Oxford Dictionary of the Jewish Religion* (New York / Oxford: Oxford University Press, 1997), 330.
121. "Jacob Klatzkin," in R.J. Zwi Werblowsky and Geoffrey Wigoder, eds., *The Oxford Dictionary of the Jewish Religion* (New York / Oxford: Oxford University Press, 1997), 402-403.
122. "Franz Rosenzweig," in R.J. Zwi Werblowsky and Geoffrey Wigoder, eds., *The Oxford Dictionary of the Jewish Religion* (New York / Oxford: Oxford University Press, 1997), 589-590.

123. "Rosenzweig," in Simon Critchley and William R. Schroeder, eds., *A Companion to Continental Philosophy* (Malden, Mass. / Oxford: Blackwell, 1998), 319-328.
124. "Jewish Scholarship as Vocation," in Alfred L. Ivry, Elliot R. Wolfson and Allan Arkush, eds., *Perspectives on Jewish Thought and Mysticism: Dedicated to the Memory of Alexander Altmann* (Amsterdam: Harwood Academic Publishers, 1998), 33-48.
125. Book Review: "Nathan Rotenstreich, 'Reson and Its Manifestations: A Study on Kant and Hegel'," *Iyyun* 47 (1998), 100-101 [Hebrew].
126. "The 'Kriegserlebnis' and Jewish Consciousness," in Wolfgang Benz, Arnold Paucker and Peter Pulzer, eds., *Jüdisches Leben in der Weimarer Republik* (Tübingen: Mohr Siebeck, 1998), 225-237.
127. "Cultural Zionism's Image of the Educated Jew: Reflections on Creating a Secular Jewish Culture," *Modern Judaism* 18/3 (1998), 227-239 [Special Issue: 100 Years of Zionism and the 50<sup>th</sup> Anniversary of the State of Israel].  
- "Heet beeld van de geletterde jood in het cultureel zionisme," *Nexus* 23 (1999), 53-66.
128. "Wissensbilder im modernen jüdischen Denken," in Ulrich Raulff and Gary Smith, eds., *Wissensbilder: Strategien der Überlieferung* (Berlin: Akademie Verlag, 1999), 221-239.
129. "Jewish Self-Hatred and the Dialectics of Assimilation: A comment on Todd M. Endelman," in Michael Brenner, Rainer Liedtke and David Rechter, eds., *Two Nations: British and German Jews in Comparative Perspective* (Tübingen: Mohr Siebeck, 1999), 365-369.
130. "Philosophy and Theology of Judaism in Modern Europe," in Jacob Neusner, Alan J. Avery-Peck and William Scott Green, eds., *The Encyclopedia of Judaism*, vol. 2 (Leiden: Brill, 1999), 735-755.
131. "Philosophy and Theology of Judaism in the State of Israel," in Jacob Neusner, Alan J. Avery-Peck and William Scott Green, eds., *The Encyclopedia of Judaism*, vol. 2 (Leiden: Brill, 1999), 755-763.
132. "Obrazy poznania v moernej zdovskej filozofii," *Filozofia* (Bratislava) 54:5 (1999), 329-339.
133. "The Berlin Jew as Cosmopolitan," in Emily D. Bilski, ed., *Berlin Metropolis: Jews and the New Culture, 1890-1918* (Berkeley: University of California Press, 1999), 14-31.
134. "Comments to Haim Gordon, 'A Lost Opportunity: A Buberian Outlook on the Occupation'," in Haim Gordon, ed., *Looking Back at the June 1967 War* (Westport, Conn. / London: Praeger, 1999), 73-77.
135. "Nahum Glatzer," *American National Biography*, vol. 9. (New York / Oxford: Oxford University Press, 1999), 107-108.
136. "Zwischen Anamnesis und Anagnorisis – die Dialektik der jüdischen Erinnerung," in Ashraf Noor, ed., *Erfahrung und Zäsur: Denkfiguren der deutsch-jüdischen Moderne* (Freiburg i. Br.: Rombach, 1999), 39-58.
137. "Secular Forms of Jewishness," in Jacob Neusner and Alan J. Avery-Peck, eds., *The Blackwell Companion to Judaism* (Oxford / New York: Blackwell, 2000), 461-476.
138. "Théologie," in Elie Barnavi and Saul Friedländer, eds., *Les Juifs et le XX siècle: Dictionnaire critique* (Paris: Calmann-Lévy, 2000), 378-396.
139. "Vorwort," in Eleonore Lappin, *Der Jude, 1916-1928: Jüdische Moderne zwischen Universalismus und Partikularismus* (Tübingen: Mohr Siebeck, 2000), vii-xi.

140. "Foreword," in David Barzilai, *Homo Dialogicus: Martin Buber's Contribution to Philosophy* (Jerusalem: Magnes Press, 2000), 11-12 [Hebrew].
141. "The Aporiae of Dialogue: Reflections on Martin Buber's Non-Noetic Conception of Faith," in Marco M. Olivetti, ed., *Intersubjectivité et théologie philosophique* (Padova: Cedam, 2001), 685-698.
142. "Zarathustra as a Prophet of Jewish Renewal: Nietzsche and the Young Martin Buber," *Revista Portuguesa de Filosofia* 57/1 (2001), 103-111.
143. "Religionsphilosophie," in Elke-Vera Kotowski, Julius H. Schoeps, and Hiltrud Wallenborn, eds., *Handbuch zur Geschichte der Juden in Europa*, vol. 2: *Religion, Kultur, Alltag* (Darmstadt: Primus, 2001), 221-239.
144. "Rosenzweig's Concept of Miracle," in Jens Mattern, Gabriel Motzkin, and Shimon Sandbank, eds., *Jüdisches Denken in einer Welt ohne Gott: Festschrift für Stéphane Mosès* (Berlin: Vorwerk 8, 2001), 53-66.
145. "Apologia," in Daniel Terris and Sylvia Fuks Fried, eds., *Catholics, Jews, and the Prism of Conscience: Responses to James Carroll's "Constantine's Sword: The Church and the Jews: A History"* (Waltham: Brandeis University Press, 2001), 69-76.
146. "El Humanismo postmoderno," in Shulamit Goldsmit, ed., *Humanismo en el Pensamiento Judío* (México City: Universidad Iberoamericana, 2002), 20-38.
147. "Jewish Philosophy and Theology," in Martin Goodman, ed., *The Oxford Handbook of Jewish Studies* (New York / Oxford: Oxford University Press, 2002), 756-769.
148. "Säkularisierung im modernen Judentum oder zur Dialektik von Judentum und Atheismus," in Jens Mattern, ed., *Einbruch der Wirklichkeit: Die Realität der Moderne zwischen Säkularisierung und Entsäkularisierung* (Berlin: Vorwerk 8, 2002), 129-149.
149. "Buber's Rhetoric," in Paul Mendes-Flohr, ed., *Martin Buber: A Contemporary Perspective* [Proceedings of an international conference held at the Israel Academy of Sciences and Humanities] (Jerusalem / Syracuse, NY: The Israel Academy of Sciences / Humanities and Syracuse University Press, 2002), 1-24.
150. "Post-Traditional Jewish Identities," in Bernd Scherer and Hans-Michael Haufig, eds., *Religion: Eine europäisch-christliche Erfindung?* (Berlin: Philo, 2003), 201-213.
151. "Franz Rosenzweig and Friedrich Meinecke," *Nexus* 37 (2003), 107-112.
152. "Introduction," in Alexander Altmann, *Abraham Adolf Altmann (1879-1944): My Father, Memories and Research* (Jerusalem: Leo Baeck Institute, 2003), 5-11 [Hebrew].
153. "Lament's Hope," in Moishe Postone and Eric L. Santner, eds., *Catastrophe and Meaning: The Holocaust and the Twentieth Century* (Chicago: University of Chicago Press, 2003), 250-256.
154. "Martin Buber," in Andreas B. Kilcher and Ottfried Fraisse, eds., *Metzler Lexikon Jüdischer Philosophen* (Stuttgart: Metzler, 2003), 336-340.
155. "Moses Mendelssohn," in Andreas B. Kilcher and Ottfried Fraisse, eds., *Metzler Lexikon Jüdischer Philosophen* (Stuttgart: Metzler, 2003), 187-191.
156. "Nathan Rotenstreich," in Andreas B. Kilcher and Ottfried Fraisse, eds., *Metzler Lexikon Jüdischer Philosophen* (Stuttgart: Metzler, 2003), 438-440.
157. "Introductory remarks," to the special issue on "the Jewish Renaissance," *Jewish Studies Quarterly* 10:4 (2003), 291-295.

158. "Between Tradition and Traditionalism" [Siegfried Wiedenhofer, "Tradition – Geschichte – Gedächtnis: Was bringt eine komplexe Traditionstheorie?"], *Erwägen Wissen Ethik* 15:2 (2004), 266.
159. "Die Gesellschaft – An Early Trans-Disciplinary Project," in Charles Camic and Hans Joas, eds., *The Dialogical Turn: New Roles for Sociology in the Postdisciplinary Age: Essays in Honor of Donald N. Levine* (Lanham, Maryland: Rowman and Littlefield, 2004), 105-114.
160. "Entering the Synagogue through the Portals of the Church: Franz Rosenzweig's 'Conversion' to Judaism," in *Jahrbuch des Simon-Dubnow-Instituts*, vol. 3 (Göttingen: Vandenhoeck & Ruprecht, 2004), 131-138.
161. "Martin Buber," in Philip Mattar, ed., *Encyclopedia of the Modern Middle East & North Africa*, 2<sup>nd</sup> Edition, vol. 1 (Detroit: Thomson Gale / Macmillan Reference, 2004), 540-541.
162. Spiritualität: Judentum," in Hans Dieter Betz et al., eds., *Religion in Geschichte und Gegenwart*, 4th ed., vol. 7 (Tübingen: Mohr Siebeck, 2004), 1598-1599.
163. Book Review: "Steven E. Aschheim, 'In Times of Crisis: Essays on European Culture, Germans and Jews'," *Historia: Journal of the Historical Society of Israel* 15 (2005), 104-107 [Hebrew].
164. "The Desert Within and Social Renewal: Martin Buber's Vision of Utopia," in Michael Zank, ed., *New Perspectives on Martin Buber* (Tübingen: Mohr Siebeck, 2006), 219-230.
165. "Martin Buber as a Habsburg Intellectual," in Raphael Gross and Yfaat Weiss, eds., *Jüdische Geschichte als Allgemeine Geschichte: Festschrift für Dn Diner zum 60. Geburtstag* (Göttingen: Vandenhoeck & Ruprecht, 2006), 13-29.
166. "The Humanistic Ethic: Jewish Reflections," in William Schweiker, Michael A. Johnson and Kevin Jung, eds., *Humanity before God: Contemporary Faces of Jewish, Christian, and Islamic Ethics* (Minneapolis: Fortress Press, 2006), 175-184.
167. "A Post-Modern Humanism from the Sources of Judaism," *Revista Portuguesa de Filosofia* 62/2-4 (2006), 369-377.
168. "Reflections on the Secularization of the Jewish Library," in Avraham Shapira, ed., *the Heart's Furrow: A Tribute to Muki Tzur* (Tel Aviv: Hakibbutz Hameuchad, 2006), 224-234 [Hebrew].
169. "Response," in Alan Mittleman, ed., *The Renaissance of Jewish Philosophy in America*, 94-97).
170. "Saul Asher," in Yirmiyahu Yovel, ed., *New Jewish Time – Jewish Culture in a Secular Age: An Encyclopedic view*, vol. 1 (Jerusalem: Keter, 2007), 55-56 [Hebrew].
171. "Leo Baeck," in Yirmiyahu Yovel, ed., *New Jewish Time – Jewish Culture in a Secular Age: An Encyclopedic view*, vol. 1 (Jerusalem: Keter, 2007), 62-63 [Hebrew].
172. "S.H. Bergmann," in Yirmiyahu Yovel, ed., *New Jewish Time – Jewish Culture in a Secular Age: An Encyclopedic view*, vol. 1 (Jerusalem: Keter, 2007), 63-64 [Hebrew].
173. "Martin Buber," in Yirmiyahu Yovel, ed., *New Jewish Time – Jewish Culture in a Secular Age: An Encyclopedic view*, vol. 1 (Jerusalem: Keter, 2007), 56-57 [Hebrew].
174. "Hermann Cohen," in Yirmiyahu Yovel, ed., *New Jewish Time – Jewish Culture in a Secular Age: An Encyclopedic view*, vol. 1 (Jerusalem: Keter, 2007), 78-79 [Hebrew].
175. "Exile [Galut]," in Yirmiyahu Yovel, ed., *New Jewish Time – Jewish Culture in a Secular Age: An Encyclopedic view*, vol. 1 (Jerusalem: Keter, 2007), 20-28 [Hebrew].
176. "Faith," in Yirmiyahu Yovel, ed., *New Jewish Time – Jewish Culture in a Secular Age: An Encyclopedic view*, vol. 1 (Jerusalem: Keter, 2007), 8-11 [Hebrew].

177. "Abraham Geiger," in Yirmiyahu Yovel, ed., *New Jewish Time – Jewish Culture in a Secular Age: An Encyclopedic view*, vol. 1 (Jerusalem: Keter, 2007), 71 [Hebrew].
  178. "Samson Raphael Hirsch," in Yirmiyahu Yovel, ed., *New Jewish Time – Jewish Culture in a Secular Age: An Encyclopedic view*, vol. 1 (Jerusalem: Keter, 2007), 72-73 [Hebrew].
  179. "Moses Mendelssohn," in Yirmiyahu Yovel, ed., *New Jewish Time – Jewish Culture in a Secular Age: An Encyclopedic view*, vol. 1 (Jerusalem: Keter, 2007), 87-88 [Hebrew].
  180. "Franz Rosenzweig," in Yirmiyahu Yovel, ed., *New Jewish Time – Jewish Culture in a Secular Age: An Encyclopedic view*, vol. 1 (Jerusalem: Keter, 2007), 94-95 [Hebrew].
  181. "Nathan Rotenstreich," in Yirmiyahu Yovel, ed., *New Jewish Time – Jewish Culture in a Secular Age: An Encyclopedic view*, vol. 1 (Jerusalem: Keter, 2007), 95-96 [Hebrew].
  182. "Arthur A. Cohen," in *Encyclopedia Judaica*, 2<sup>nd</sup> ed., vol. 5 (Detroit: Thomson Gale / Macmillan Reference, 2007), 10.
  183. "Nathan Rotenstreich," in *Encyclopedia Judaica*, 2<sup>nd</sup> ed., vol. 5 (Detroit: Thomson Gale / Macmillan Reference, 2007), 478-479.
  184. "Alle sind wir Fremde in der Welt," in Uwe Justus Wenzel, ed., *Was ist eine gute Religion? Zwanzig Antworten* (Munich: C.H. Beck, 2007), 111-115.
  185. "Foreword," *Naharaim* 1:1 (2007), III-IV.
  186. "The Secularization of Jewish Cultural Memory: Epistemological and Hermeneutical Reflections," *Naharaim* 1:1 (2007), 15-22.
  187. "Introduction" to the special issue "Translating Texts, Translating Cultures," *Jewish Studies Quarterly* 14:2 (2007), 97-100.
  188. "Martin Buber: A Builder of Bridges," *Jewish Studies Quarterly* 14:2 (2007), 101-119.
  189. "Prefacio," in Paul Mendes-Flohr, Yom-Tov Assis and Leonardo Senkman, eds., *Identidades judías, modernidad y globalización* (Buenos Aires: Ediciones Limod, 2007), 10-20.
  190. "Identidades judías post-tradicionales," in Paul Mendes-Flohr, Yom-Tov Assis and Leonardo Senkman, eds., *Identidades judías, modernidad y globalización* (Buenos Aires: Ediciones Limod, 2007), 513-530.
  191. "The Philosophy of Religion or The Philosophy of Law?," *Archivio di filosofia* 75:1-2 (2007), 145-156.
  192. "The Kingdom of God: Martin Buber's Critique of Messianic Politics," *Behemoth* 1:2 (2008), 26-38.
  193. "Anti-Semitism and the Jewish-American Political Experience," in Manochehr Dorraj and Valerie Martinez-Ebers, eds., *Perspectives on Race, Ethnicity, and Religion: Identity Politics in America* (New York / Oxford: Oxford University Press, 2008), 293-313.
  194. "Tra amore sensuale e amore celeste: La lettura rosenzweigiana del 'Cantico dei Cantici'," *Teoria* 1 (2008), 31-40.
- "Between Sensual and Heavenly Love: Franz Rosenzweig's Reading of the Song of Songs," in Deborah A. Green and Laura S. Lieber, eds., *Scriptural Exegesis – The shapes of Culture and the Religious Imagination: Essays in Honor of Michael Fishbane* (Oxford / London: Oxford University Press, 2009), 310-318.

195. "The Credo of Religious Humanism: A Jewish Perspective," in Shulamit Goldsmit, ed., *Studies in Religious Humanism* (México City: Universidad Iberoamericana, 2009), 45-59.
196. "Maimonides in the Crucible of Zionism: Reflections on Yeschayahu Leibowitz's Negative Theology," in Idit Dobbs-Weinstein, Lenn E. Goodman and James Allen Grady, eds., *Maimonides and His Heritage* (Albany, NY: State University of New York Press, 2009), 181-192.
197. "Gustav Landauer," in *Encyclopedia of the Bible and its Reception* 15 (Berlin: de Gruyter, 2009), 800-801.
198. "Martin Buber," in Stefan Jordan and Burkhard Mojsisch, eds., *Reclam Philosophenlexikon* (Stuttgart: Reclam, 2009), 65-66.
199. "Franz Rosenzweig," in Stefan Jordan and Burkhard Mojsich, eds., *Reclam Philosophenlexikon* (Stuttgart: Reclam, 2009), 264-266.
200. "Elia Smuele Artom," in Hans-Josef Klauck et al., eds., *Encyclopedia of the bible and its Reception*, vol. 1 (Berlin / New York: de Gruyter, 2009), 857.
201. "Reflections on the Ethical and Political Dialectics of Commitment," *Criterion* 47:3 (Spring / Summer 2010), 11-13.
202. "Jewish Co-Existentialism," in Robert Bernasconi and Jonathan Judaken, eds., *Situating Existentialism* (New York: Columbia University Press, 2010), 311-333.
203. (with William Schweiker et al.) "Review article: Grappling with Charles Taylor's 'A Secular Age'," *Journal of Religion* 90:3 (2010), 367-400.
204. Book Review: "Michael Fishbane, 'Sacred Attunement: A Jewish Theology'," *Journal of Religion* 90:4 (2010), 609-611.
205. "Der Dialog und die Möglichkeit des Friedens," in Wolfgang Krone, Thomas Reichert and Meike Sigfried, eds., *Dialog, Frieden, Menschlichkeit. Beiträge zum Denken Martin Bubers* (Berlin: Verlag für Berlin-Brandenburg, 2010), 17-24.
206. "The Legacy of German Jewry," in: *The Hermann Levin Goldschmidt Memorial Lecture* (2010), 1-11.
207. "The Road not Taken: Martin Buber and the Politics of Dialogue," *Shma* 40/669 (April 2010), 12-13.
208. "The Binding of Space," in Mar Jane Jacob, ed., *Earth within Meaning* (Durham: Gregg Museum of Arts and Design, 2011), 212-215.
209. "Elias Auerbach," in Hans-Josef Klauck et al., eds., *Encyclopedia of the Bible and its Reception*, vol. 3 (Berlin / New York: de Gruyter, 2011), 95.
210. "Leah's Hope: The Legacy of German-Jewish Humanism in America," in Eitan P. Fishbane and Jonathan D. Sarna, eds., *Jewish Renaissance and Revival in America: Leah Fishbane in Memoriam* (Waltham, MA: Brandeis University Press, 2012), 123-133.
211. *Encrujadas en la Modernidad*. Buenos Aires: Promento Libros, 2011.
212. "Preface" to Alin Bontas, *A Subjective Positive Rational System: Franz Rosenzweig* (Göttingen: Vandenhoeck & Ruprecht, 2011), xiii-xiv.
213. "Foreword," in Eugen Rosenstock-Huussy, ed., *Judaism despite Christianity: The 1916 Wartime Correspondence between Eugen Rosenstock-Huussy and Franz Rosenzweig*, 2<sup>nd</sup> ed. (Chicago: University of Chicago Press, 2011), vii-xi.
214. "Jewish Co-Existentialism. Being with the Other," in Robert Bernasconi and Jonathan Judaken, eds., *Situating Existentialism* (New York: Columbia University Press, 2011), 311-333.
215. "The Mandarins of Jerusalem," *Naharaim* 4:2 (2011), 177-182.



216. "Response to William A. Galston, 'Jewish Philosophy and American Democracy'," in Raphael Jospe and Dov Schwartz, eds., *Jewish Philosophy: Perspectives and Retrospectives* (Boston: Academic Studies Press, 2012), 150-155.
217. "Kulturzionismus," in *Enzyklopädie jüdischer Geschichte und Kultur 2* (Stuttgart / Weimar: Verlag J.B. Metzler, 2012), 454-458.
218. "Lehrhaus," in *Enzyklopädie jüdischer Geschichte und Kultur 2* (Stuttgart / Weimar: Verlag J.B. Metzler, 2012), 376-378.
219. "Dialog," in *Enzyklopädie jüdischer Geschichte und Kultur 2* (Stuttgart / Weimar: Verlag J.B. Metzler, 2012), 124-129.
220. "Philosophie," in *Enzyklopädie jüdischer Geschichte und Kultur 4* (Stuttgart/Weimar: Verlag J.B. Metzler, 2012), 532-542.
221. "Stern der Erlösung," in *Enzyklopädie jüdischer Geschichte und Kultur 2* (Stuttgart / Weimar: Verlag J.B. Metzler, 2012), 592-597.
222. "Secular Forms of Jewishness," in David M. Gordis and Zachary I. Heller, eds., *Jewish Secularity: The Search for Roots and The Challenges of Relevant Meaning* (Lanham: University Press of America, 2012), 4-19.
223. "The Secularization of Jewish Cultural Memory: Epistemological and Hermeneutical Reflections," in David M. Gordis and Zachary I. Heller, eds., *Jewish Secularity: The Search for Roots and The Challenges of Relevant Meaning* (Lanham: University Press of America, 2012), 91-98.
224. "Dialogical Silence," in Henny Fiskå Hägg and Aslaug Kristiansen, eds., *Attending to Silence: Educators and Philosophers on the Art of Listening* (Kristiansand: Portal Forlag, 2012), 15-21.
225. "Spirituality in Judaism," in *Religion Past and Present*, vol. 12 (Leiden: Brill, 2012), 229-230.
226. "La promessa e i limiti del dialogo le religioni," in Irene Kajon, ed., *Roveto Ardente. Scritti sull'ebraismo tedesco in memoria di Francesca Y. Albertini* (Rome: Lithos Editrice, 2013), 119-133.
227. "Martin Buber," in Stefan Jordan und Burkhard Mojsisch, eds., *Philosophielexikon* (Stuttgart: Reclam, 2013), 104-107.
228. "Franz Rosenzweig," in Stefan Jordan und Burkhard Mojsisch, eds., *Philosophielexikon* (Stuttgart: Reclam, 2013), 466-468.
229. "The Promise and Limitations of Interfaith Dialogue," *Criterion* 59:1 (Spring-Summer 2013), 2-9.
230. "Reflections on The Promise and Limitations of Inter-Faith Dialogue," *European Judaism* 46:1 (Spring 2013), 4-14.
231. "Martin Buber and Martin Heidegger in Dialogue," *The Journal of Religion* 94/1 (2014), 2-25.
232. "Introduction," in Paul Mendes-Flohr and Anya Mali, eds., *Gustav Landauer: Anarchist and Jew* (Berlin: de Gruyter, 2014), 1-13.
233. "Faith, Modern Jewish Conceptions," in *Encyclopedia of the Bible and its Reception*, vol. 8 (Berlin: de Gruyter, 2014), 710-711.
234. "Prologue," in Natan Ofek (Popik), *Kafka: Clave de una Crisis Judaismo y modernida* (Buenos Aires: Ardervo Cultural Editores, 2014), 9-12.
235. "The Politics of Decency: Martin Buber's Vision of Arab-Jewish Rapprochement," *Palestine-Israel Journal* 19:3 (2014), 77-81.
236. "The Anxiety of Influence. Constantin Brunner's and Martin Buber's Mismatching," in Irene Aue-Ben-David, Gerhard Lauer and Jürgen Stenzel, eds.,

*Constantin Brunner im Kontext: Ein Intellektueller zwischen Kaiserreich und Exil*, (Oldenbourg: de Gruyter, 2014), 321-333.

237. "Martin Buber on Monotheism and Its Discontents," in Michael Zank and Ingrid Anderson, eds., *The Value of the Particular: Lessons from Judaism and the Modern Jewish Experience - Festschrift for Steven T. Katz on the Occasion of his Seventieth Birthday - Series: Supplements to The Journal of Jewish Thought and Philosophy*, vol. 25 (Leiden / Boston: Brill 2015), 138-149.
238. "Introduction," in Paul Mendes-Flohr and Anya Mali, eds., *Gustav Landauer: Anarchist and Jew* (Oldenbourg: de Gruyter, 2015), 1-13.
239. "Messianic Radicals: Gustav Landauer and other German-Jewish Revolutionaries," in Paul Mendes-Flohr and Anya Mali, eds., *Gustav Landauer: Anarchist and Jew* (Oldenbourg: de Gruyter, 2015), 14-44.
240. "Jewish Intellectuals Confront Modernity: Walter Benjamin, Martin Buber and Leo Strauss," in Claudia Welz, ed., *Ethics of In-Visibility: Imago Dei, Memory, and Human Dignity in Jewish and Christian Thought* (Tübingen: Mohr Siebeck, 2015), 155-167.
241. "Exemplary Leaders: Martin Buber and Franz Rosenzweig," in ChaeRan Y. Freeze, Sylvia Fuks Fried and Eugene R. Sheppard, eds., *The Individual in History: Essays in Honor of Judah Reinharz* (Waltham, Mass.: Brandeis University Press, 2015), 347-362.
242. "Between Sensual and Heavenly Love: Franz Rosenzweig's Reading of the Song of Songs," in Michael Welker and William Schweiker, eds., *Images of the Divine and Cultural Orientations: Jewish, Christian, and Islamic Voices* (Leipzig: Evangelische Verlagsanstalt, 2015), 95-102.
243. "Martin Buber," *Oxford Bibliographies*, online, last reviewed 2015.
244. "Introduction: Dialogue as a Trans-Disciplinary Concept," in Paul Mendes-Flohr, ed., *Dialogue as a Trans-Disciplinary Concept: Martin Buber's Philosophy of Dialogue and Its Contemporary Reception* (Berlin / Munich / Boston: de Gruyter, 2015), 1-7.
245. Avihu Zakaki and Paul Mendes-Flohr, "Introduction," in Avihu Zakaki, Paul Mendes-Flohr and Zeev Gries, eds., *Fields in the Wind: A Tribute to Avraham Shapira* (Jerusalem: Carmel Publishers, 2015), 9-11 (Hebrew).
246. "From Jerusalem to Kibbutz Yizrael: The Mandarins of Jerusalem," in Avihu Zakaki, Paul Mendes-Flohr and Zeev Gries, eds., *Fields in the Wind: A Tribute to Avraham Shapira* (Jerusalem: Carmel Publishers, 2015), 156-166 (Hebrew).
247. "Foreword," in Mark Raider, ed., *The Essential Hayim Greenberg: Essays and Addresses on Jewish Culture, Socialism, and Zionism* (Alabama: University of Alabama Press, 2015), xi-xii.
248. "Utopie," *Enzyklopädie jüdischer Geschichte und Kultur*, first published online 2016.
249. "Stern der Erlösung," *Enzyklopädie jüdischer Geschichte und Kultur*, first published online 2016.
250. "Kulturzionismus," *Enzyklopädie jüdischer Geschichte und Kultur*, first published online 2016.
251. "Philosophie," *Enzyklopädie jüdischer Geschichte und Kultur*, first published online 2016.
252. "German Kultur and the Discovery of the Unconscious. The Promise and Discontents of the German-Jewish Experience," in Erel Shalit and Murray Stein,

- eds., *Turbulent Times, Creative Minds: Erich Neumann and C.G. Jung in Relationship (1933-1960)* (Ashville: Chiron, 2016), 83-93.
253. "Dialogue," *Encyclopedia of Jewish History and Culture Online*, first published online 2017.
  254. "Geleitwort," in Traugott Jännichen and Andreas Losch, eds., *Hans Ehrenberg als Grenzgänger zwischen Theologie und Philosophie* (Kamen: Harmut Spenner, 2017), ix-x.
  255. "Honoring Dean M. Mitchell," *Criterion* 52: 1 (2017): 21-22.
  256. "Freies Jüdisches Lehrhaus," *Encyclopedia of Jewish History and Culture Online*, first published online 2017.
  257. "Cultural Zionism!," *Encyclopedia of Jewish History and Culture Online*, first published online 2017.
  258. (with Sam Berrin Shonkoff) "Preface," *The Journal of Jewish Thought and Philosophy*, 25:1 (2017), 1-3.
  259. "Dialogue and the Crafting of a Multi-Cultural Society," in Guenther Thomas and Heike Springhart, eds., *Responsibility and the Enhancement of Life: Essays in Honor of William Schweiker* (Leipzig: Evangelische Verlagsanstalt, 2017), 309-317.
  260. "Franz Rosenzweig", Oxford Bibliographies, last reviewed 2018.
  261. "Buber's Provocation," in Sam Berrin Shonkoff, ed., *Martin Buber: His Intellectual and Scholarly Legacy* (Leiden: Brill, 2018), 140-148.
  262. "Introduction," in Martin Buber, *Daniel: Dialogues on Realization*, trans. Maurice Friedman (New York: Syracuse University Press, 2018), ix-xvii.
  263. "The Courage to be an Outsider," *Dialog und Konflikt* (2018), 17-28.
  264. "Gnostic Anxieties: Jewish Intellectuals and Weimar Neo-Marcionism," *Modern Theology* 35:1 (2019), 71-80.
  265. "Introduction," in Paul Mendes-Flohr, Rachel Livneh-Freudenthal and Guy Miron, eds., *Jewish Historiography Between Past and Future: 200 Years of Wissenschaft des Judentums* (Berlin: de Gruyter, 2019), 1-6.
  266. "Wissenschaft des Judentums at the Fin-de Siecle," in Paul Mendes-Flohr, Rachel Livneh-Freudenthal and Guy Miron, eds., *Jewish Historiography. Between Past and Future. 200 Years of Wissenschaft des Judentums* (Berlin: de Gruyter, 2019), 163-180.
  267. "Martin Buber and Gershom Scholem on Hasidism," *Christliche und jüdische Mystik* (2020), 67-72.
  268. "God Created the World, not Religion," *Journal of Religion and Theology* 4:2 (2020), 10-11: <https://www.sryahwpublications.com/journal-of-religion-and-theology/pdf/v4-i2/3.pdf>.
  269. "Buber's Affirmation of German-Jewish Symbiosis," *Dialog als Prinzip. Festschrift für Hans-Joachim Werner*, ed. W. Krone und J. Waßer (Bodenbourg: Verlag Edition, 2020), 13-23.
  270. "Dialogical Affirmations of Theological Incommensurables," *Una filosofia dell'uomodalle fonti del Giudaismo. Studi in onore di Irene Kajon. Archivio di filosofia*. 2021, 15-21.
  271. Preface (with David Ellenson), Leo Baeck, *Individuum Ineffabile*, trans., B. Mehlman and G. Padawer (Cincinnati: HUC Annual, 2021), 261-69.
  272. "About the Term Exile," *Critical Inquiry* 46:2 (2020), 436-447.
  273. "Martin Buber and Gershom Scholem on Hasidism: A Methodological Dispute," in Christoph Marksches, ed., *Christliche und jüdische Mystik*:

- Gemeinsamkeiten und Unterschiede* (Leipzig: Evangelische Verlagsanstalt, 2020), 67-72.
274. "Requiem for the Mandarins of Jerusalem," *Modern Judaism* 40:1 (2020), 87-95.
  275. "Is the World Redeemable? Contra Redemption," *The Journal of Jewish Thought and Philosophy* 29:1 (2021), 24-29.
  276. "Jewish Intellectuals on the Chimera of Progress: Walter Benjamin, Martin Buber and Leo Strauss," in Yohanan Friedmann and Christoph Marksches, eds., *Religious Responses to Modernity* (Berlin / Boston: de Gruyter, 2021), 64-78.
  277. "Foreword," in Manuel de Oliveira, *Humanity Divided. Martin Buber and the Challenge of Being Chosen* (Berlin: de Gruyter, 2021), 7.
  278. "Cri de cœur: Lachrymose Reflections on Israeli-Palestinian Relations," in *Tikkun* (June 1 2021), see <https://www.tikkun.org/cri-de-coeur/>.
  279. "Stéphane Mosès' Angels," *Naharaim* 15:1 (2021), 15-18.
  280. "A Gentle Caveat: The Slippery Slope of Familial Belonging – Review of: *Kinship, Law and Politics: An Anatomy of Belonging* by Joseph E. David (Cambridge: Cambridge University Press, 2020)," in: *Journal of Law and Religion* 37:2 (2022), 388-390.
  281. "The Price and Promise of Jewish Emancipation," *Sources*. Spring 2022, 29-38.
  282. "Living in the Shadow of Death: Jewish Affirmations of Life," *Religions* 13:1 (2022), see <https://doi.org/10.3390/rel13010026>.
  283. "Dialogue and the Experience of the Other," *Philosophy: An International Journal* 5: 4 (2022), 1-5, see <https://medwinpublishers.com/PhIJ/dialogue-and-the-experience-of-the-other.pdf>
  284. "Modernity in Search of Meaning." *Fragile Finitude Forum, Marginalia. Los Angeles Jewish Review of Books* (November 2022), see <https://themarginaliareview.com/masthead/>.
  285. "Hospitality: A Taste of Eternity," *Philosophy: An International Journal* 5:4 (Winter 2022), see <https://medwinpublishers.com/PhIJ/hospitality-a-taste-of-eternity.pdf>.
  286. "Towards Truth and Reconciliation," *Shepherd. Discover the Best Books. A Monthly News Letter* (November 2022), digital, no pagination.
  287. "The Idolatry of the Written Word," in Alon Goshen-Gottstein, ed., *Idolatry: A Contemporary Jewish Conversation* (Boston: Academic Studies Press, 2023), 254-263.
  288. "Foreword" to Martin Buber, *The Way of Man according to the Teachings of Hasidism*, trans., annotations, and epilogue B. Mehlman and G. Padawer, 2<sup>nd</sup>, expanded (New York: CAAR Press, 2023), xi-xii.
  289. "When Memory Comes: Let the Tears Flow," *The Journal of Holocaust Research* 37: 1 (2023): *Special Issue in Honor of Professor Saul Friedländer*, 22-25.
  290. "Politics of Decency," *Philosophy: An International Journal* 6: 1 (2023), 1-4, see <https://medwinpublishers.com/PhIJ/politics-of-decency.pdf>.
  291. "Introduction and annotations" to Martin Buber, *I and Thou*, trans. Walter Kaufmann. Jubilee Edition (New York: Free Press, 2023), viii-xxvi, 121-127.
  292. "Introduction" to Martin Buber, *I and Thou*, trans. R.G. Smith. Centenary Edition (New York: Simon & Schuster, 2023), vii-xxiii, 127-133.
  293. "'My Marriage to the German-Jewish Intellectual Legacy': A Conversation with Paul Mendes-Flohr moderated by Stephen Dowden, Brandeis University" in: *Nexus. Essays in German-Jewish Studies*, Vol. 6 (Rochester, New York: Camden House, 2023), 47-57.

294. "Judaism Facing the Challenge of Modernity". First published online 2023, see [https://projects.au.dk/fileadmin/projects/Epistemological\\_Aspects\\_of\\_Dialogue/Mendes-Flohr.Challenges\\_of\\_Modernity.rev.pdf](https://projects.au.dk/fileadmin/projects/Epistemological_Aspects_of_Dialogue/Mendes-Flohr.Challenges_of_Modernity.rev.pdf).

### Forthcoming

295. "Shlomo Friedländer: Portrait of a Jewish Kantian," in Shlomo Friedländer, *Kant für Kinder*, trans. and ed. by Bruce Krawski (Berlin: de Gruyter, 2023).
296. "Buber and Our Palestinian Partners," in Ron Margolin and Hannah Vitelson, eds., *Research and Conversations on the Hundredth Anniversary of Martin Buber's "I and Thou."* (Hebrew).
297. Review of Michael A. Meyer, *Rabbi Leo Baeck. Living a Religious Imperative in Trouble Times* (Pennsylvania University Press, 2021), in *Association of Jewish Studies Review*.
298. Review of Shaul Magid, *Meir Kahane. The Political Life of a Jewish Radical* (Princeton: Princeton University Press, 2020), in *Critical Inquiry*.
299. "Eros of Dialogue," in Iulian Apostolescu, ed., *The Phenomenology of Love* (Bloomsbury).
300. "The Sanctification of the Everyday," *Filozofia: Institute of Philosophy, Slovak Academy of Sciences*.
301. "Jewish-Christian Relations in the Enlightenment," *Encyclopedia of Jewish-Christian Relations* (Berlin: Walter de Gruyter).
302. "An Elective Affinity: Eberhard Arnold and Martin Buber," *The Plough*.
303. "Voices of Silence: On Listening," in *Dialogical Approaches to the 'In-Between' Self and Others*, ed. Claudia Welz et al.
304. "Levinas und das aschkenasische rabbinische Judentum," in *Emmanuel Levinas Handbuch*, ed. René Dausner et al. (Metzler Verlag).
305. "Dialogphilosophie I: Buber und Levinas," in *Emmanuel Levinas Handbuch*, ed. René Dausner et al. (Metzler Verlag).
306. "Aschkenasisches Judentum," in *Emmanuel Levinas Handbuch*, ed. René Dausner et al. (Metzler Verlag).
307. "Between Jesus and Paul: From Apologetics to Jewish Theological Affirmations," *Journal of Religion*.
